# Supplementary material for: Disinfection of bromide-containing tryptophan water by UV/chlorine: brominated halonitromethane formation, impact factors, and pathways
Source: Royal Society of Chemistry journal article supplement (doi:10.1039/d2ew00854h), 2023-01-01
Supplement: d2ew00854h1.pdf [file d2ew00854h1.pdf]

**Supplementary Information For**

**Disinfection of bromide-containing tryptophan water by  
UV/chlorine: Brominated halonitromethanes formation,  
impact factors, and pathways**

Tao Wang, Lin Deng\*, Wenjuan Dai, Jun Hu, Rajendra Prasad Singh, Chaoqun Tan

*Department of Municipal Engineering, Southeast University, Nanjing 211189, China*

*\* Corresponding author: Lin Deng  
E-mail address: [denglin10974@163.com](mailto:denglin10974@163.com)  
Tel: +86 13951974771*

**This document consists of 15 pages including 6 texts, 4 tables, and 7 figures.**

## Contents

|                                                                                                                                                                                                                                                                                                                                                                                                                                       |    |
|---------------------------------------------------------------------------------------------------------------------------------------------------------------------------------------------------------------------------------------------------------------------------------------------------------------------------------------------------------------------------------------------------------------------------------------|----|
| <b>Text S1.</b> Chemicals and reagents.....                                                                                                                                                                                                                                                                                                                                                                                           | 3  |
| <b>Text S2.</b> The average light intensity of the UV lamp .....                                                                                                                                                                                                                                                                                                                                                                      | 3  |
| <b>Text S3.</b> The analytical methods for Br-HNMs.....                                                                                                                                                                                                                                                                                                                                                                               | 4  |
| <b>Text S4.</b> The analytical methods for intermediates .....                                                                                                                                                                                                                                                                                                                                                                        | 5  |
| <b>Text S5.</b> Determination of chlorine and nitrogen .....                                                                                                                                                                                                                                                                                                                                                                          | 5  |
| <b>Text S6.</b> The calculation of bromine utilization factors (BUFs) .....                                                                                                                                                                                                                                                                                                                                                           | 6  |
| <b>Table S1.</b> Physical and chemical properties of nine HNMs.....                                                                                                                                                                                                                                                                                                                                                                   | 7  |
| <b>Table S2.</b> Properties of tryptophan.....                                                                                                                                                                                                                                                                                                                                                                                        | 8  |
| <b>Table S3.</b> The degradation of Br-HNMs by LP-UV irradiation and HO•.....                                                                                                                                                                                                                                                                                                                                                         | 8  |
| <b>Table S4.</b> The information on the possible intermediates .....                                                                                                                                                                                                                                                                                                                                                                  | 9  |
| <b>Fig. S1.</b> Illustration of experimental set-up. The 500 mL cylindrical quartz reactor has double layers with an inner diameter of 10.0 cm, a height of 20.0 cm, and a thickness of 1.0 cm. A low-pressure UV mercury lamp (254 nm) was used to supply UV irradiation. The average fluence rate ( $Ep^0$ ) of this UV lamp was determined to be 2.1 mW cm <sup>-2</sup> (Text S2). .....                                          | 10 |
| <b>Fig. S2.</b> Time-dependent profile of I <sub>3</sub> <sup>-</sup> absorbance at 352 nm.....                                                                                                                                                                                                                                                                                                                                       | 11 |
| <b>Fig. S3.</b> Photolysis of H <sub>2</sub> O <sub>2</sub> at 254 nm.....                                                                                                                                                                                                                                                                                                                                                            | 11 |
| <b>Fig. S4.</b> Degradation efficiencies and kinetics of BNM, DBNM, TBNM, BCNM, DBCNM, and BDCNM under UV irradiation, UV+chlorine, and UV+Br <sup>-</sup> , respectively. Experimental conditions: [BNM] = [DBNM] = [TBNM] = [BCNM] = [DBCNM] = [BDCNM] = 200 μg L <sup>-1</sup> , [free chlorine] = 1.0 mg L <sup>-1</sup> , [Br <sup>-</sup> ] = 1.0 mg L <sup>-1</sup> , pH=7.0, UV intensity was 2.1 mW cm <sup>-2</sup> . ..... | 12 |
| <b>Fig. S5.</b> Effects of free chlorine concentration on bromine utilization factors (BUFs) in the presence of Br <sup>-</sup> during UV/chlorine disinfection. [Tryptophan] = 2.0 mmol/L, [free chlorine] = 0.2, 0.3, 0.6, 1.2, 1.8 mmol/L, [Br <sup>-</sup> ] = 0.6 mmol/L, pH = 7.0. ....                                                                                                                                         | 13 |
| <b>Fig. S6.</b> Effects of pH on bromine utilization factors (BUFs) in the presence of Br <sup>-</sup> during UV/chlorine disinfection. Experimental conditions: [Tryptophan] = 2.0 mmol/L, [free chlorine] = 1.8 mmol/L, [Br <sup>-</sup> ] = 0.6 mmol/L, pH = 6.0, 7.0, 8.0. ....                                                                                                                                                   | 13 |
| <b>Fig. S7.</b> GC/MS spectra for intermediate products during UV/chlorine disinfection in the presence of tryptophan and Br <sup>-</sup> . Experimental conditions: [Tryptophan] = 2.0 mmol/L, [free chlorine] = 1.8 mmol/L, [Br <sup>-</sup> ] = 0.6 mmol/L, pH = 7.0. ....                                                                                                                                                         | 14 |

### Text S1. Chemicals and reagents

Bromonitromethane (BNM), dibromonitromethane (DBNM), tribromonitromethane (TBNM), bromochloronitromethane (BCNM), bromochloronitromethane (BDCNM), and dibromochloronitromethane (BDCNM) were purchased from Quality Control Chemicals (USA). Methyl tert-butyl ether (MTBE) was purchased from Aladdin (China). Tryptophan, sodium bromide (NaBr), sodium thiosulfate ( $\text{Na}_2\text{S}_2\text{O}_3$ ), disodium phosphate ( $\text{Na}_2\text{HPO}_4$ ), and sodium dihydrogen phosphate ( $\text{NaH}_2\text{PO}_4$ ) were purchased from Sinopharm (China). Sodium hypochlorite (NaOCl, 5%) purchased from Sigma-Aldrich (China) was used to prepare free chlorine solution.

### Text S2. The average light intensity of the UV lamp

**Photon fluence rate.** The photon fluence rate ( $I_0$ ) was measured by iodide/iodate chemical actinometry. The reaction solution (500 mL, pH 9.0) consisted of potassium iodide (0.6 M), potassium iodate (0.1 M) and sodium tetraborate (0.01 M). The value of  $I_0$  was calculated by Eq. S1.

$$A_{352} = \Phi_{\text{I}_3^-} \times I_0 \times \varepsilon_{\text{I}_3^-} \times t \quad (\text{S1})$$

where  $A_{352}$ ,  $\Phi_{\text{I}_3^-}$  and  $\varepsilon_{\text{I}_3^-}$  are the absorbance of  $\text{I}_3^-$  at 352 nm, apparent quantum yield of  $\text{I}_3^-$  ( $\text{M einstein}^{-1}$ ), and molar absorption coefficient of  $\text{I}_3^-$  ( $\text{M}^{-1} \text{ cm}^{-1}$ ), respectively;  $t$  is the radiation time (s). At 352 nm, the values of  $\Phi_{\text{I}_3^-}$  and  $\varepsilon_{\text{I}_3^-}$  were  $0.74 \text{ mol einstein}^{-1}$  and  $26400 \text{ M}^{-1} \text{ cm}^{-1}$ , respectively. The time-dependent profile of  $\text{I}_3^-$  absorbance is shown in SI Fig. S2. Thus, the value of  $I_0$  was determined to be  $1.45 \times 10^{-6} \text{ Einstein L}^{-1} \text{ s}^{-1}$ .

**Effective path length.** The effective path length ( $L$ ) was measured by the photolysis kinetics of hydrogen peroxide ( $\text{H}_2\text{O}_2$ ) with low concentrations and then calculated by Eq. S2.

$$\frac{dc_t}{dt} = -2.303 \times L \times \Phi_{\text{H}_2\text{O}_2} \times I_0 \times \varepsilon_{\text{H}_2\text{O}_2} \times c_t = -k_{\text{obs}} c_t \quad (\text{S2})$$

where  $c_t$  is the concentration of  $\text{H}_2\text{O}_2$  (M),  $\varepsilon_{\text{H}_2\text{O}_2}$  is the molar absorption coefficient of  $\text{H}_2\text{O}_2$  ( $\text{M}^{-1} \text{cm}^{-1}$ ),  $I_0$  is the photon fluence rate ( $\text{Einstein L}^{-1} \text{s}^{-1}$ ) and  $\Phi_{\text{H}_2\text{O}_2}$  is the apparent quantum yield of  $\text{H}_2\text{O}_2$  photolysis ( $\text{mol Einstein}^{-1}$ ). At 254 nm, the values of  $\Phi_{\text{H}_2\text{O}_2}$  and  $\varepsilon_{\text{H}_2\text{O}_2}$  were  $1.0 \text{ mol einstein}^{-1}$  and  $19.6 \text{ M}^{-1} \text{cm}^{-1}$ , respectively. The photolysis kinetics of  $\text{H}_2\text{O}_2$  was shown in [SI Fig. S3](#). The effective path length was measured to be 3.05 cm.

**Average fluence rate.** The average fluence rate ( $E_p^0$ ) was calculated by [Eq. S3](#).

$$E_p^0 = I_0 \times L \times u_\lambda \quad (\text{S3})$$

where  $I_0$  is the photon fluence rate ( $\text{Einstein L}^{-1} \text{s}^{-1}$ ),  $L$  is the effective path length (cm),  $u_\lambda$  is the energy of 1 M photons ( $4.71 \times 10^5 \text{ J Einstein}^{-1}$  at 254 nm). The value of  $E_p^0$  was  $2.1 \text{ mW cm}^{-2}$ .

**Text S3.** The analytical methods for Br-HNMs

The concentrations of Br-HNMs were measured using a gas chromatograph (Agilent HP6890, USA) equipped with an HP-1 chromatographic column ( $30.0 \text{ m} \times 0.32 \text{ mm} \times 5.0 \text{ }\mu\text{m}$ ). The temperature program consisted of an initial temperature of  $50 \text{ }^\circ\text{C}$  for 5 min, followed by ramping to  $140 \text{ }^\circ\text{C}$  at  $10 \text{ }^\circ\text{C min}^{-1}$ , and then ramping to  $280 \text{ }^\circ\text{C}$  at  $20 \text{ }^\circ\text{C min}^{-1}$ . The temperature of the injection port was set at  $235 \text{ }^\circ\text{C}$ , and the ECD detector temperature was set at  $280 \text{ }^\circ\text{C}$ . The injection volume ( $1 \text{ }\mu\text{L}$ ) was carried by a high purity nitrogen (99.999%) gas with a constant flow rate of  $1.0 \text{ mL min}^{-1}$ .

**Text S4.** The analytical methods for intermediates

The analysis of intermediates was performed using a gas chromatograph-quadrupole mass spectrometer (GC-MS, Agilent 7890A GC, 5975 MS) equipped with an HP-5m separation column (30 m × 0.25 mm, 0.25 μm). The temperature program consisted of an oven temperature of 40 °C for 2 min, followed by ramping to 300 °C at 40 °C min<sup>-1</sup> and held for 5 min. The temperature of the injection port was set at 300 °C, and the detector temperature was set at 280 °C. The injection volume (1 μL) was carried by a helium gas with a constant flow rate of 1.0 mL min<sup>-1</sup>. The MS was operated in the total ion chromatogram mode and selected ion monitoring mode.

**Text S5.** Determination of chlorine and nitrogen

The concentrations of free chlorine and total chlorine were determined by the DPD-FAS method. The concentrations of total nitrogen (TN), ammonium nitrogen (NH<sub>4</sub><sup>+</sup>-N), and nitrate nitrogen (NO<sub>3</sub><sup>-</sup>-N) were determined by alkaline potassium persulfate digestion-UV spectrophotometry, Nessler's reagent spectrophotometry, and UV spectrophotometry, respectively. The concentration of dissolved organic nitrogen (DON) was obtained by subtracting the concentrations of NH<sub>4</sub><sup>+</sup>-N, nitrite nitrogen (NO<sub>2</sub><sup>-</sup>-N), and NO<sub>3</sub><sup>-</sup>-N from the concentration of TN, and the concentration of NO<sub>2</sub><sup>-</sup>-N was negligible because of the strong oxidative status of the reaction system.

**Text S6.** The calculation of bromine utilization factors (BUFs)

Bromine utilization factors (BUFs) represent the ratio of bromide ions used to form Br-HNMs to the initial concentration of bromide ions in the water samples, which can be calculated by [Eq. S4](#).

$$\text{BUF} = \frac{[\text{BNM}] + [\text{BCNM}] + [\text{BDCNM}] + 2[\text{DBNM}] + 2[\text{DBCNM}] + 3[\text{TBNM}]}{[\text{Br}^-]} \quad (\text{S4})$$

where all concentrations are on a molar basis.

**Table S1.** Physical and chemical properties of nine HNMs

| Compounds                 | Abbreviation | Structure                                                                           | Weight | pKa  | Boiling point<br>(°C, 760<br>mm Hg) | Solubility<br>(mg/L,<br>20°C) |
|---------------------------|--------------|-------------------------------------------------------------------------------------|--------|------|-------------------------------------|-------------------------------|
| Chloronitromethane        | CNM          | 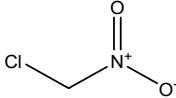   | 95.5   | 7.30 | 122.5                               | 32020                         |
| Dichloronitromethane      | DCNM         |    | 130    | 5.97 | 107                                 | 11750                         |
| Trichloronitromethane     | TCNM         |    | 164.5  | --   | 112                                 | 105800                        |
| Bromonitromethane         | BNM          |   | 140.0  | 7.56 | 147.472                             | 18680                         |
| Dibromonitromethane       | DBNM         |  | 219.0  | 6.08 | 152.7                               | 4577                          |
| Tribromonitromethane      | TBNM         |  | 298.0  | --   | 155.9                               | 227.5                         |
| Bromochloronitromethane   | BCNM         |  | 174.5  | 7.28 | 132.7                               | 9163                          |
| Bromodichloronitromethane | BDCNM        |  | 209.0  | --   | 115.5                               | 1007                          |
| Dibromochloronitromethane | DBCNM        |  | 253.5  | --   | 134.9                               | 486.1                         |

**Table S2.** Properties of tryptophan

| Amino acids | Formula weight | Molecular structure                                                                 |
|-------------|----------------|-------------------------------------------------------------------------------------|
| Tryptophan  | 204.2          | 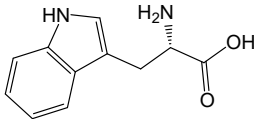 |

**Table S3.** The degradation of Br-HNMs by LP-UV irradiation and HO•

| HNMs  | $\varepsilon_{254}$ ( $M^{-1} cm^{-1}$ ) | $\Phi_{254}$ | $k_f$ ( $\times 10^{-4} cm^2 mJ^{-1}$ ) | $k_{HO\cdot}$ ( $\times 10^8 M^{-1} s^{-1}$ ) |
|-------|------------------------------------------|--------------|-----------------------------------------|-----------------------------------------------|
| BNM   | 136                                      | 0.109        | N.A.                                    | 0.84                                          |
| BCNM  | N.A.                                     | N.A.         | N.A.                                    | 4.2                                           |
| DBNM  | 1570                                     | 0.146        | N.A.                                    | 4.75                                          |
| BDCNM | 228                                      | 0.52         | 5.8                                     | 1.16                                          |
| DBCNM | 525                                      | 0.54         | 13.7                                    | 1.65                                          |
| TBNM  | 729                                      | 0.59         | 20.8                                    | 2.38                                          |

N.A. represents not available.

$\varepsilon$  is the molar absorption coefficient for HNMs ( $M^{-1} cm^{-1}$ ),  $\Phi$  is the quantum yield,  $k_f$  is the photolysis rate constant, and  $k_{HO\cdot}$  is the second-order rate constant of the reaction of HO• and HNMs<sup>[1-5]</sup>.



**Table S4.** The information on the possible intermediates

| Molecular formulas     | Structure                                                                           | Weight | m/z   | Ions      |
|------------------------|-------------------------------------------------------------------------------------|--------|-------|-----------|
| $C_{11}H_{11}N_2O_2Br$ | 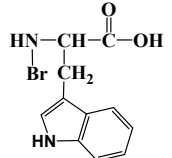   | 283    | 283   |           |
| $C_{10}H_9N_2OBr$      |    | 253    | 252.9 |           |
| $CH_3NOBr_2$           |    | 205    | 205.1 |           |
| $CH_2NOBr$             |    | 124    | 125   | $(M+H)^+$ |
| $CH_2NOBrCl_2$         |  | 195    | 194.9 |           |
| $CHNOBr_2$             |  | 203    | 203.1 |           |
| $CNOBr_3$              |  | 282    | 283   | $(M+H)^+$ |

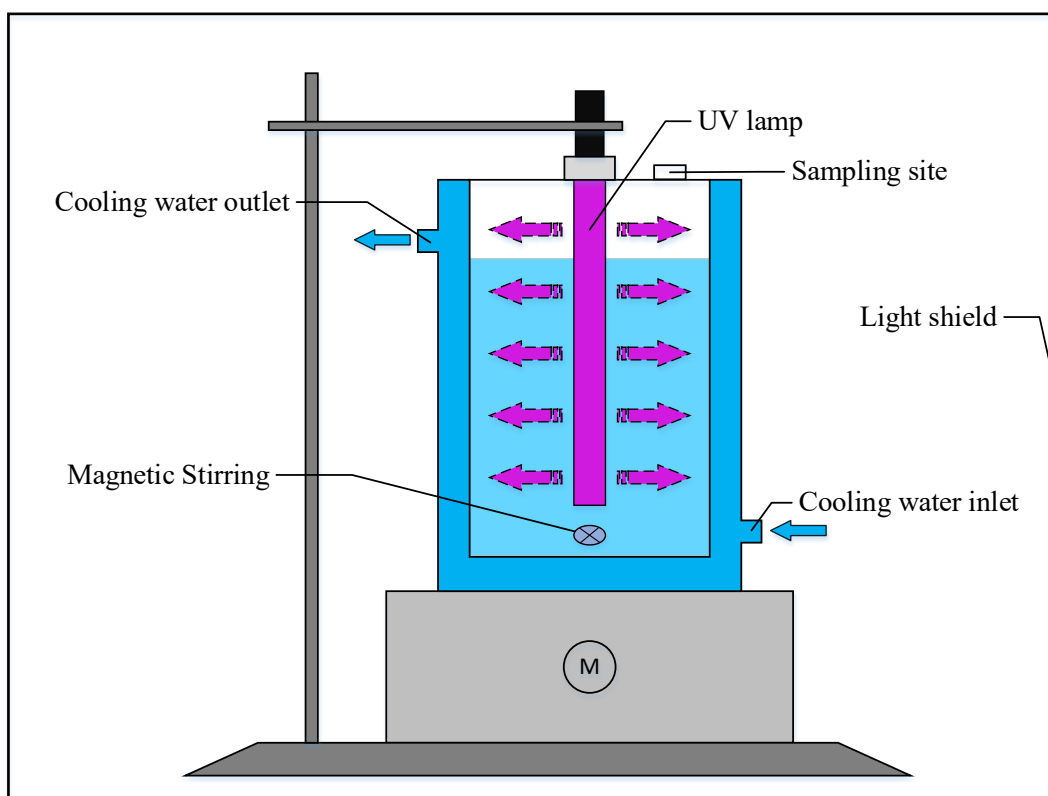

**Fig. S1.** Illustration of experimental set-up. The 500 mL cylindrical quartz reactor has double layers with an inner diameter of 10.0 cm, a height of 20.0 cm, and a thickness of 1.0 cm. A low-pressure UV mercury lamp (254 nm) was used to supply UV irradiation. The average fluence rate ( $E_p^0$ ) of this UV lamp was determined to be 2.1  $\text{mW cm}^{-2}$  (Text S2).

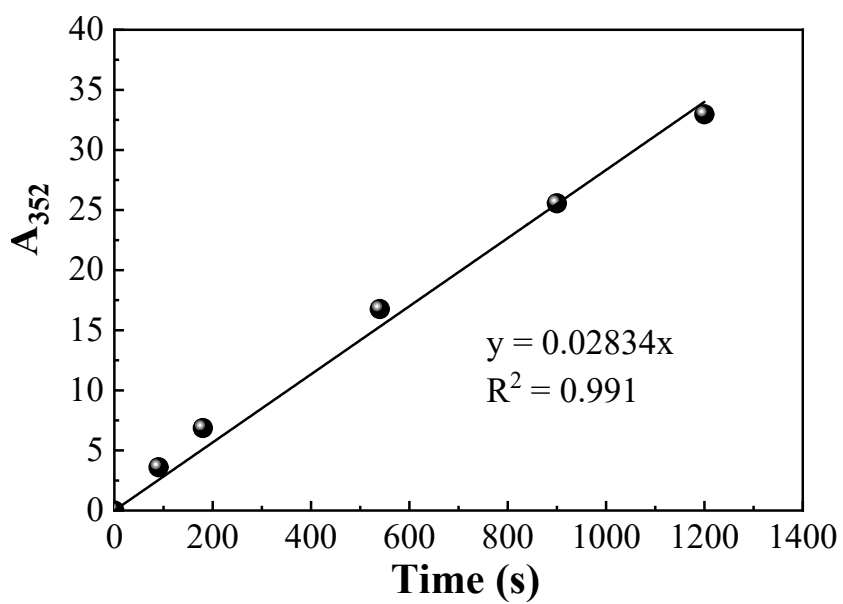

Fig. S2. Time-dependent profile of  $I_3^-$  absorbance at 352 nm

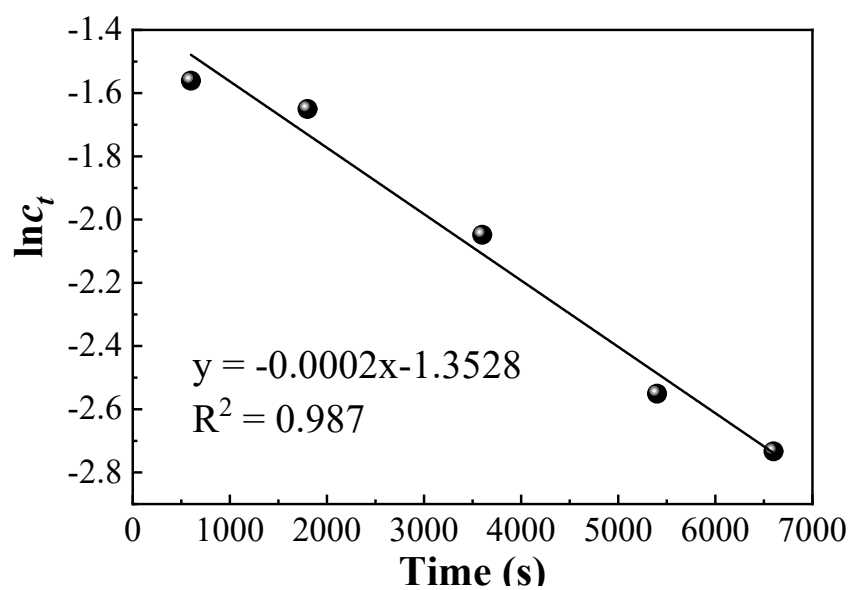

Fig. S3. Photolysis of  $H_2O_2$  at 254 nm

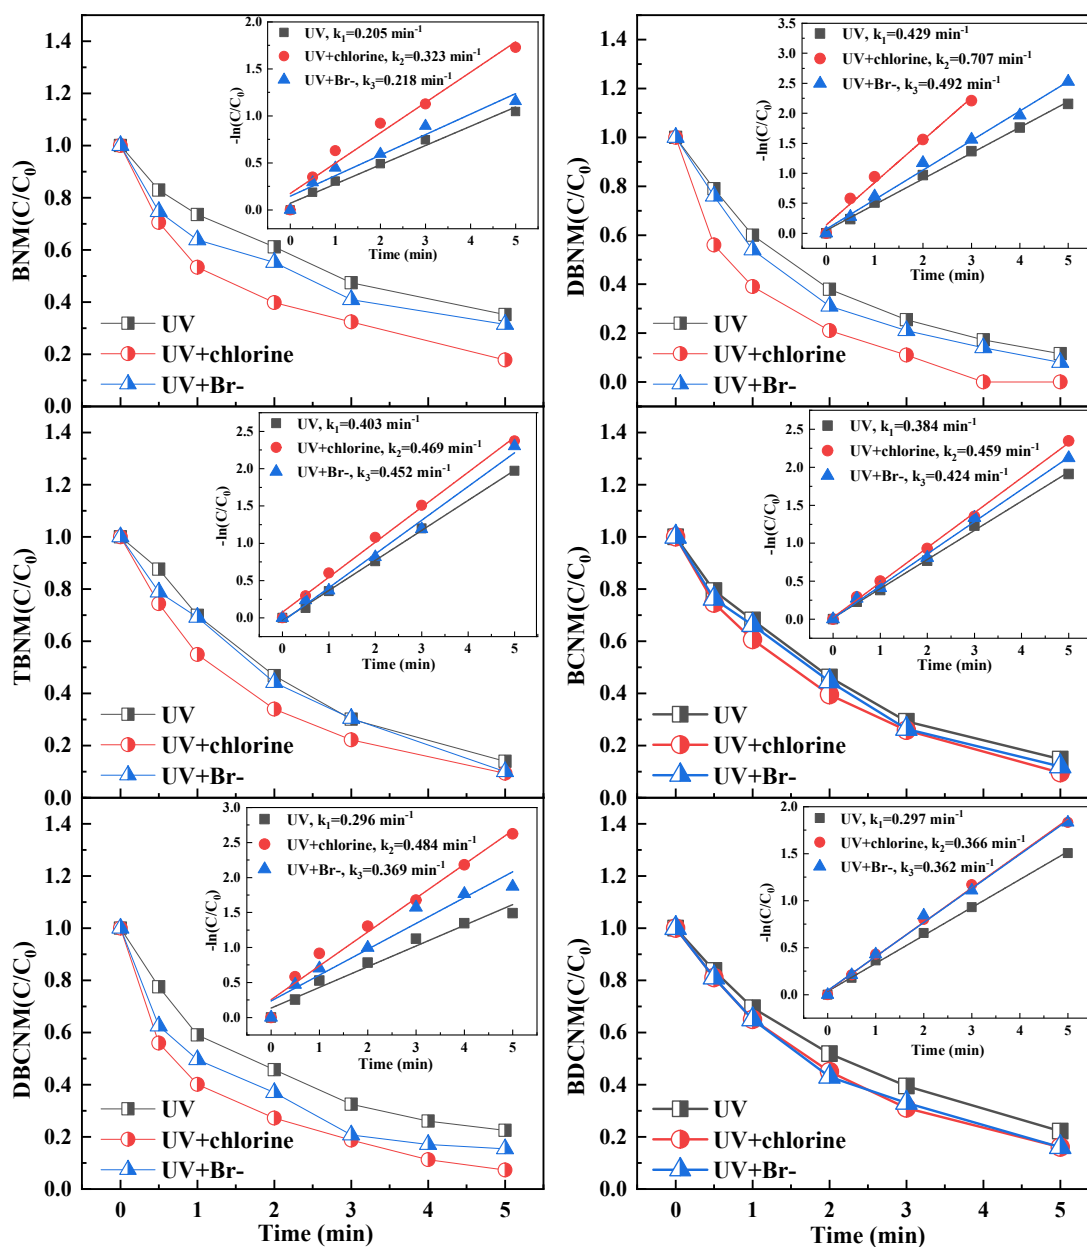

**Fig. S4.** Degradation efficiencies and kinetics of BNM, DBNM, TBNM, BCNM, DBCNM, and BDCNM under UV irradiation, UV+chlorine, and UV+Br<sup>-</sup>, respectively. Experimental conditions: [BNM] = [DBNM] = [TBNM] = [BCNM] = [DBCNM] = [BDCNM] = 200  $\mu\text{g L}^{-1}$ , [free chlorine] = 1.0  $\text{mg L}^{-1}$ , [Br<sup>-</sup>] = 1.0  $\text{mg L}^{-1}$ , pH=7.0, UV intensity was 2.1  $\text{mW cm}^{-2}$ .

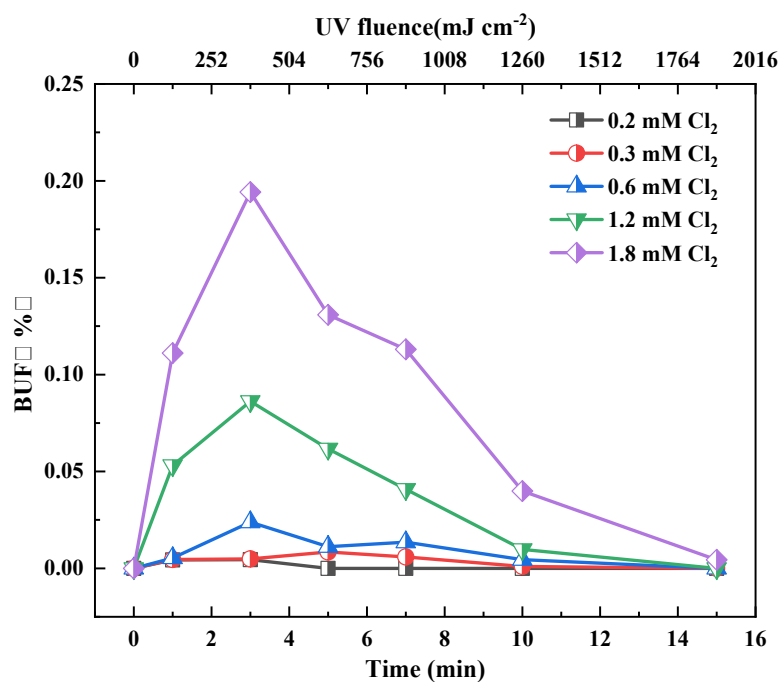

**Fig. S5.** Effects of free chlorine concentration on bromine utilization factors (BUFs) in the presence of Br<sup>-</sup> during UV/chlorine disinfection. [Tryptophan] = 2.0 mmol/L, [free chlorine] = 0.2, 0.3, 0.6, 1.2, 1.8 mmol/L, [Br<sup>-</sup>] = 0.6 mmol/L, pH = 7.0.

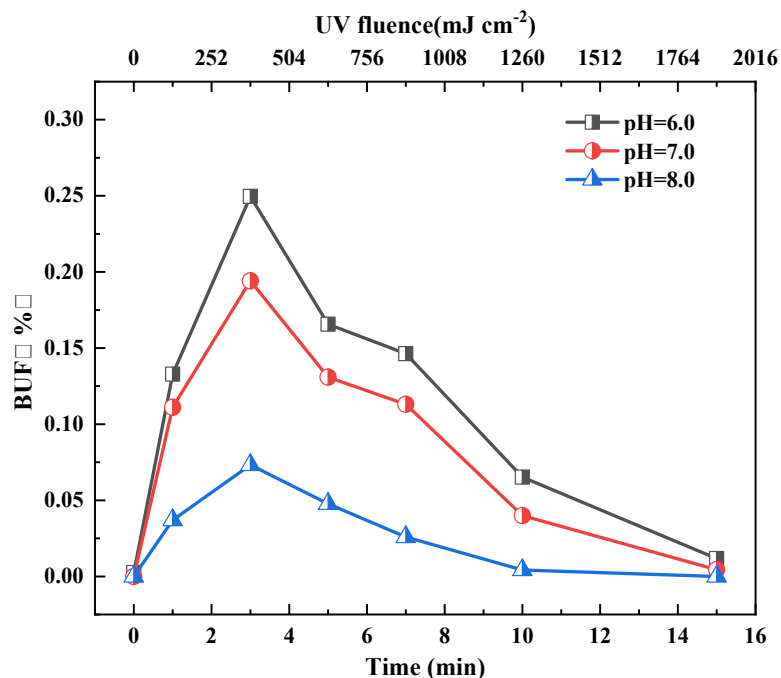

**Fig. S6.** Effects of pH on bromine utilization factors (BUFs) in the presence of Br<sup>-</sup> during UV/chlorine disinfection. Experimental conditions: [Tryptophan] = 2.0 mmol/L, [free chlorine] = 1.8 mmol/L, [Br<sup>-</sup>] = 0.6 mmol/L, pH = 6.0, 7.0, 8.0.

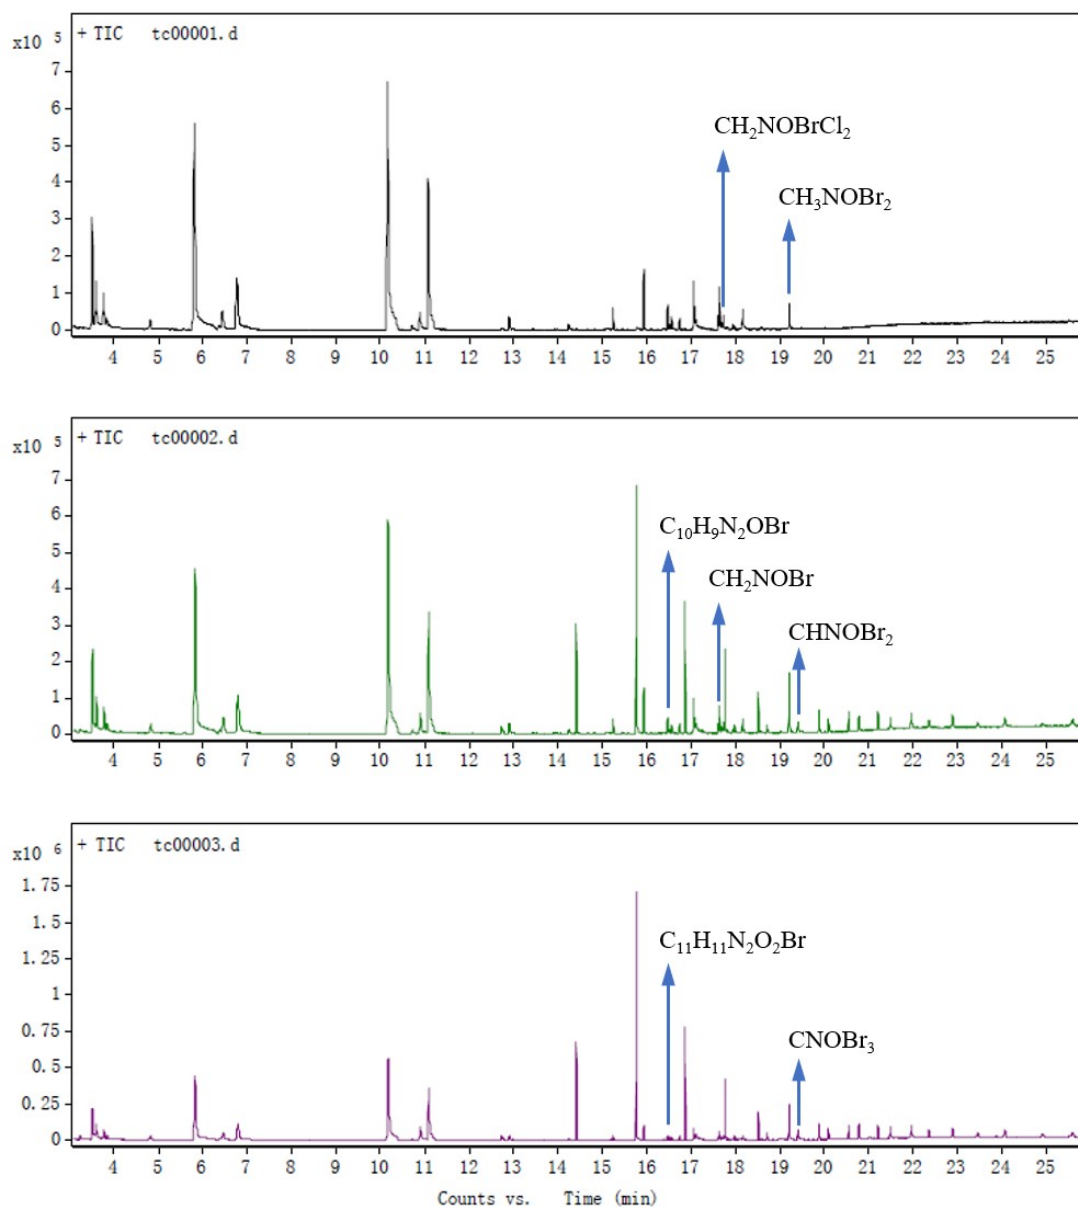

**Fig. S7.** GC/MS spectra for intermediate products during UV/chlorine disinfection in the presence of tryptophan and  $\text{Br}^-$ . Experimental conditions: [Tryptophan] = 2.0 mmol/L, [free chlorine] = 1.8 mmol/L,  $[\text{Br}^-]$  = 0.6 mmol/L, pH = 7.0.

## Reference

- [1] S.K. Cole, W.J. Cooper, R.V. Fox, P.R. Gardinali, S.P. Mezyk, B.J. Mincher, K.E. O'Shea, Free radical chemistry of disinfection byproducts. 2. rate constants and degradation mechanisms of trichloronitromethane (chloropicrin), *Environ. Sci. Technol.* 41 (2007) 863-869.
- [2] Y.-H. Chuang, K.M. Parker, W.A. Mitch, Development of predictive models for the degradation of halogenated disinfection byproducts during the UV/H<sub>2</sub>O<sub>2</sub> advanced oxidation process, *Environ. Sci. Technol.* 50 (2016) 11209-11217.
- [3] X. Lei, Y. Lei, X. Zhang, X. Yang, Treating disinfection byproducts with UV or solar irradiation and in UV advanced oxidation processes: A review, *J. Hazard. Mater.* 408 (2021) 124435.
- [4] S.P. Mezyk, T. Helgeson, S.K. Cole, W.J. Cooper, R.V. Fox, P.R. Gardinali, B.J. Mincher, Free radical chemistry of disinfection-byproducts. 1. kinetics of hydrated electron and hydroxyl radical reactions with halonitromethanes in water, *J. Phys. Chem. A* 110 (2006) 2176-2180.
- [5] Y. Zhang, Y. Xiao, Y. Zhang, T.T. Lim, UV direct photolysis of halogenated disinfection byproducts: Experimental study and QSAR modeling, *Chemosphere* 235 (2019) 719-725.
